# Supplementary material
Source: PubMed Central journal article supplement (PMC5991104)
Supplement: NIHMS970101-supplement-1.pdf [file NIHMS970101-supplement-1.pdf]

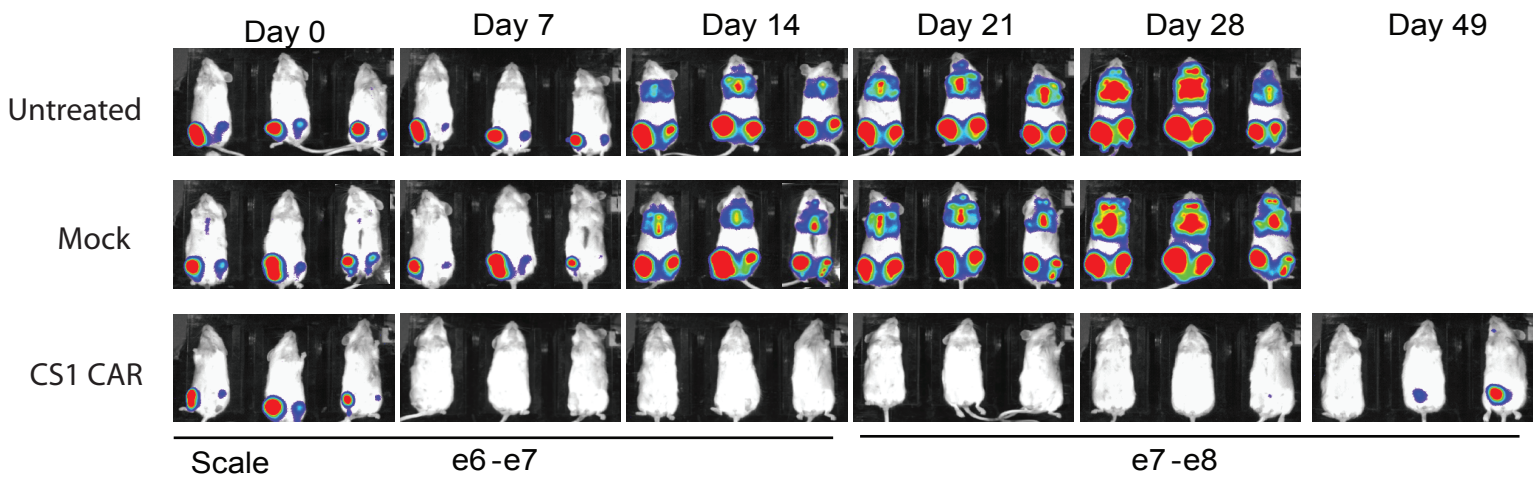

**Supplemental Figure 1. High dose CS1 CAR T cells were not able to prevent tumor relapse** A total of  $2 \times 10^6$  fflucGFP MM.1S cells were intratibially (i.t.) injected into NSG mice. Five days following tumor inoculation, mice were injected i.v. with dosed  $3 \times 10^6$  CAR T cells or non-transduced mock cells. Tumor signals were monitored with Xenogen imaging once a week.

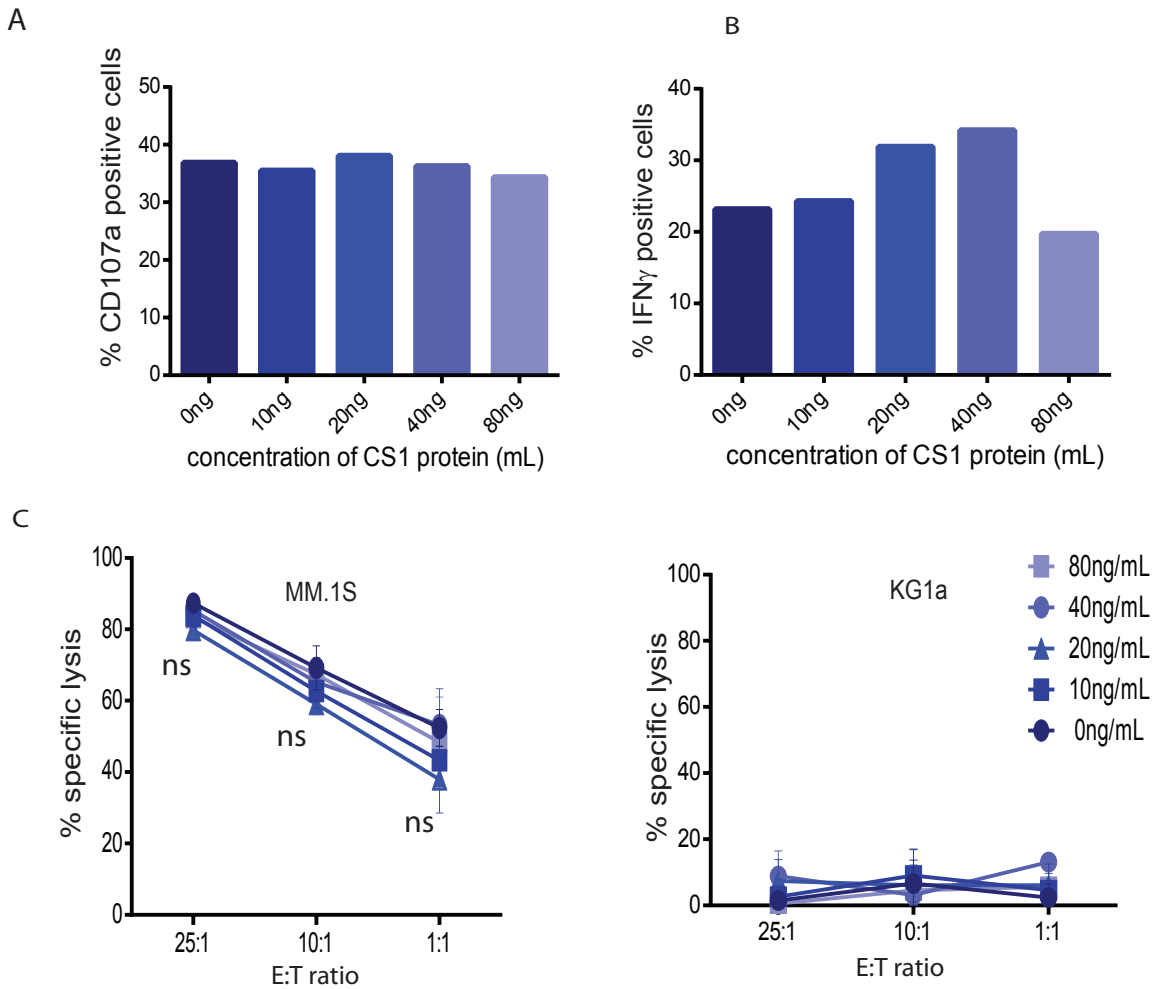

**Supplemental Figure 2. Soluble CS1 does not interfere with CS1 CAR function** (A) Expanded CS1 and BCMA CAR T cells were co-cultured with MM.1S cells at a 1:1 ratio in medium containing Golgi plug and CD107a for six hours at 37°C in the presence of CS1 protein at concentrations of 0, 10, 20, 40, and 80 ng/mL. Percentages of CD107a+ cells per CAR+ cells are presented. (B) In separate culture,  $5 \times 10^5$  CS1 T cells were activated overnight with  $5 \times 10^5$  MM.1S cells in the presence of brefeldin A. The cell mixture was then stained using anti-CD8, anti-CD3, anti-CD4, Erbitux, and streptavidin PE followed by intracellular staining with antibody against IFN $\gamma$ . IFN $\gamma$ -positive cells (CAR gated) are presented. (C) CS1 CAR T cells were co-cultured with luciferase expressing MM.1S for 4 hours in the presence of CS1 protein at concentrations of 0, 10, 20, 40, and 80 ng/mL. Specific lysis was analyzed after adding substrate luciferin. Myeloid leukemic cells KG1a were used as a negative control. Two-way ANOVA test was used.

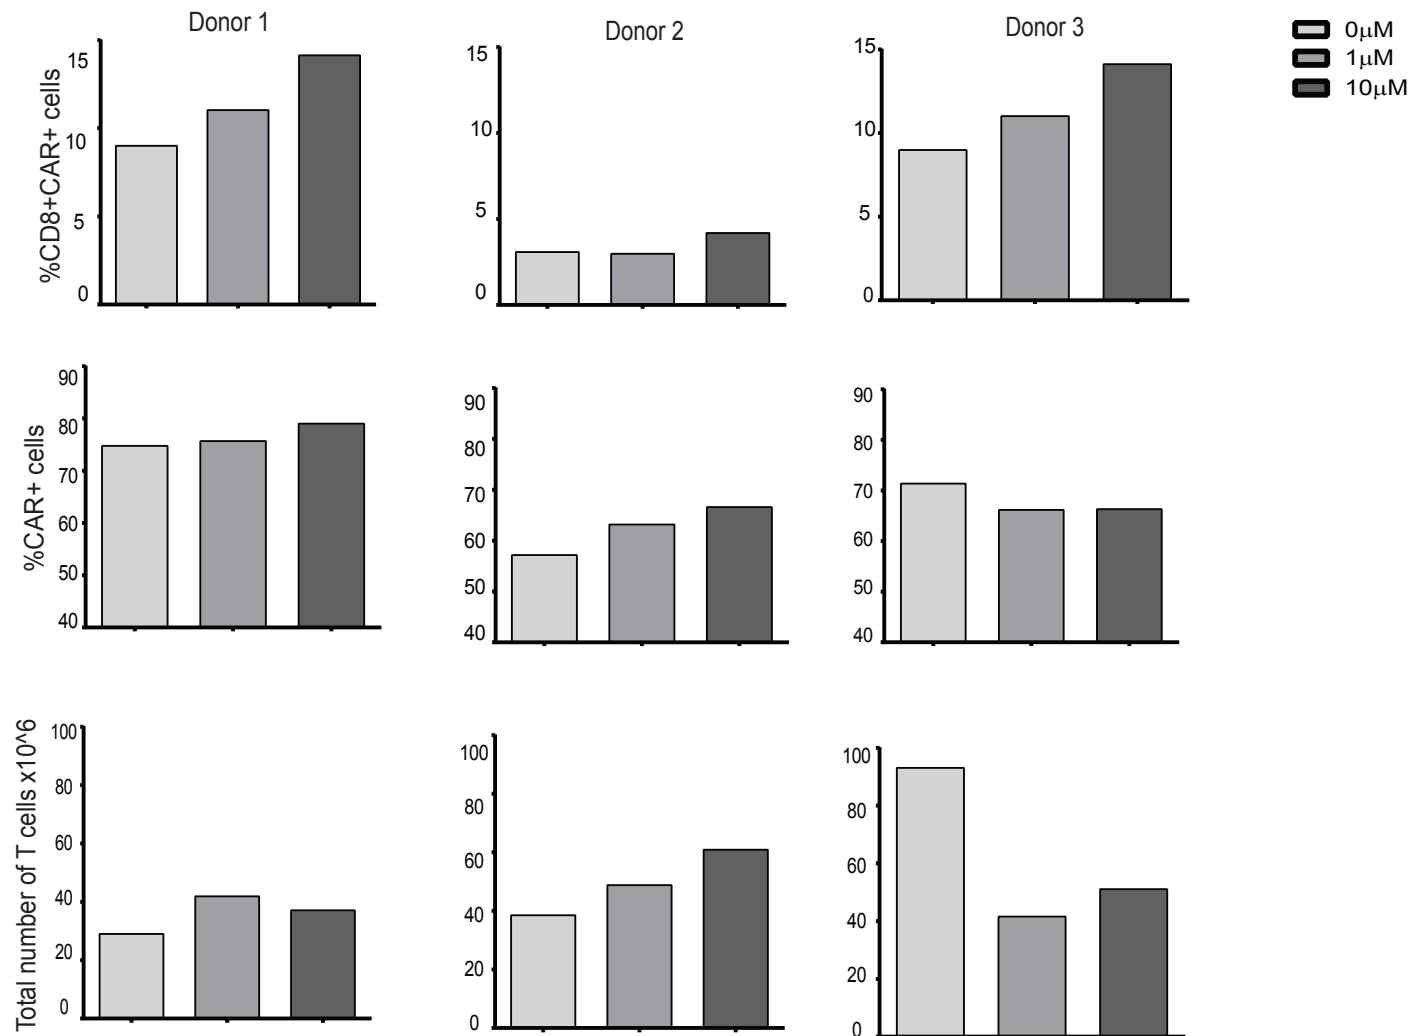

**Supplemental Figure 3. Lenalidomide preferentially expanded CD8+CAR+ T cells in a dose-dependent manner** Central memory T cells isolated from three different donors were activated and transduced with lentivirus encoding CS1 CAR and expanded in vitro in the presence of 0, 1, and 10  $\mu\text{M}$  lenalidomide. Growth of total cell number and percentages of positive cells for CD8+CAR+ and CAR+ T cells on day 20 of culture are presented.

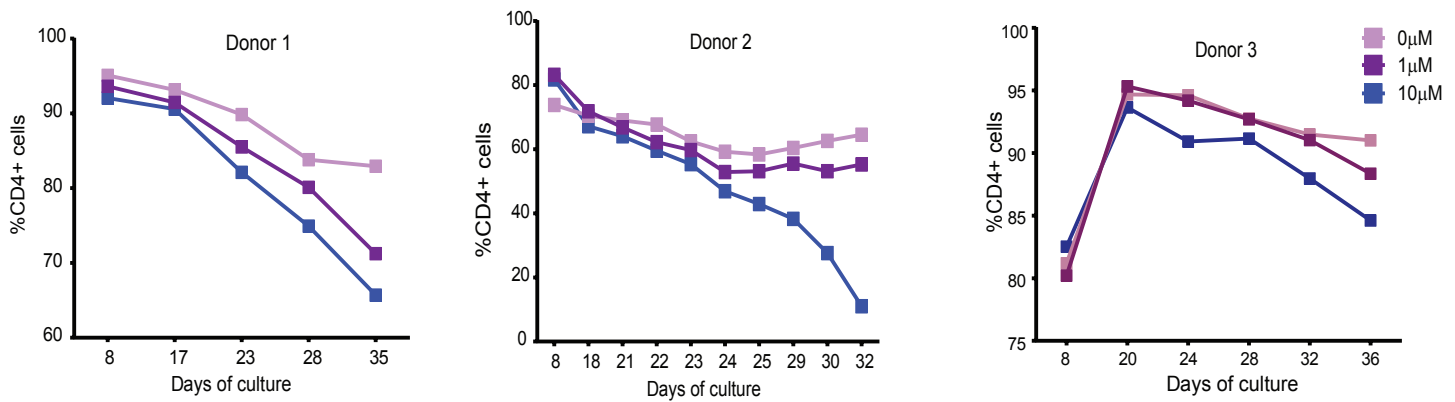

**Supplemental Figure 4. Lenalidomide decreased CD4+ T cell expansion in a dose-dependent manner** Central memory T cells isolated from three different donors were activated and transduced with lentivirus encoding CS1 CAR and expanded in vitro in the presence of 0, 1, and 10  $\mu$ M lenalidomide. Percentages of CD4+ positive cells in the cultures at different time points are presented.



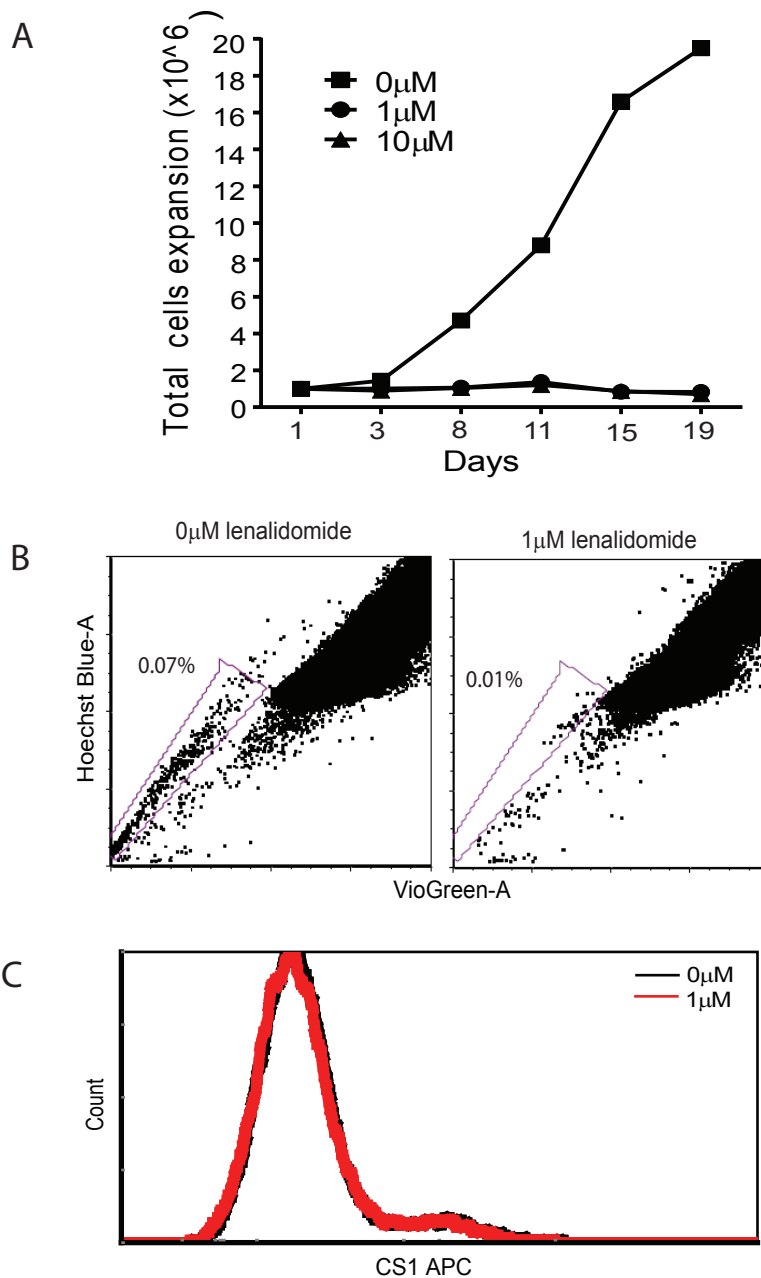

**Supplemental Figure 5. Lenalidomide eradicated MM-initiating cells without downregulation of CS1 expression on MM cells** MM.1s cells were treated with different concentrations of lenalidomide (0, 1, and 10  $\mu$ M) (A) Growth of total cell number was determined by Guava Viacount at different time points. (B) In a separate experiment, MM.1s cells were treated with lenalidomide at concentrations of 0 and 1  $\mu$ M for 48 hours. Following treatment, cells were stained with Hoechst dye at a final concentration of 5  $\mu$ g/mL. After 2 hours incubation, cells were labeled with 5  $\mu$ g/mL propidium iodide for 5 min at 4°C. Analysis was conducted with flow cytometry. Percentages of side population in 0 and 1  $\mu$ M lenalidomide-treated MM.1S cells are depicted. (C) CS1 expression on MM.1s after 48 hours treatment with 0 and 1  $\mu$ M lenalidomide.

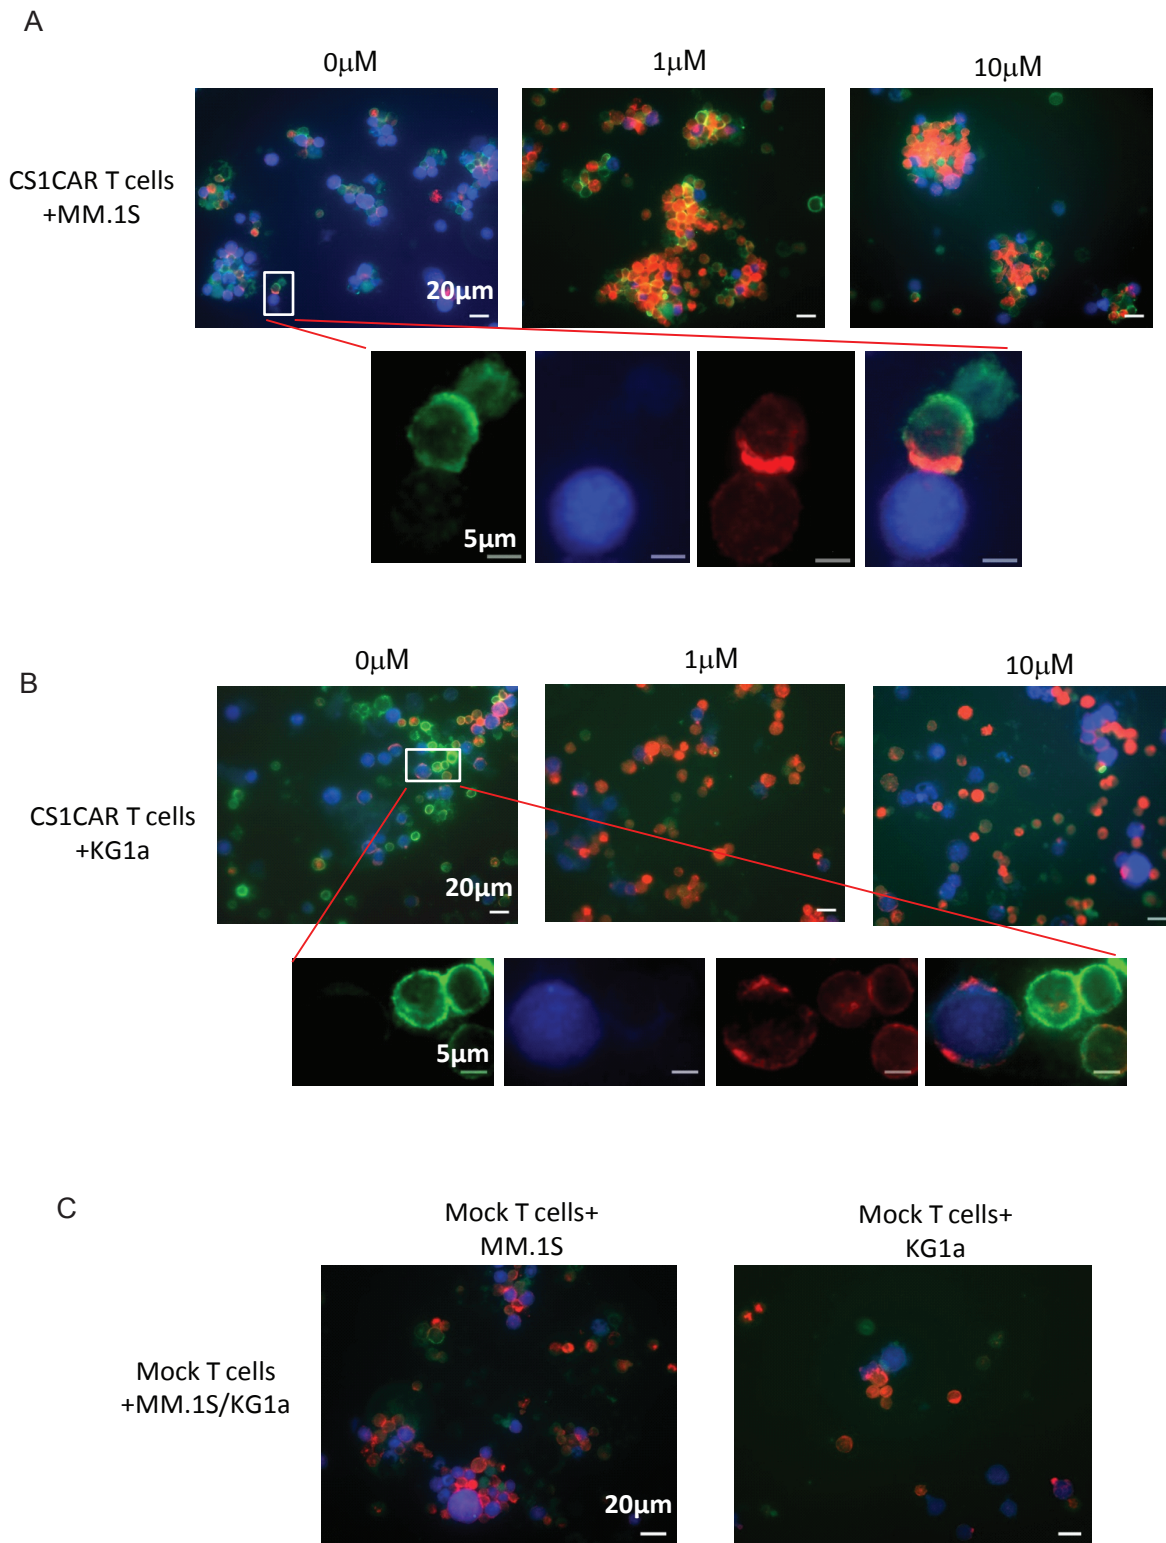

**Supplemental Figure 6. Lenalidomide improves immune synapse formation between CS1 CAR T cells and MM cells** Tumor cells labeled with CellTracker Blue were co-cultured with the same number of CS1 CAR T cells that had been treated with different concentrations of lenalidomide. After 2 hours incubation, co-cultures were washed and fixed with 4% paraformaldehyde (PFA). CAR T cells were stained with Fab antibody followed by secondary antibody conjugated with Alexa 488. The F-actin was labeled in red. The images from MM.1S and CS1 CAR T cells (A), KG1a and CS1 CAR T cells (B), and non-transduced mock T cells with MM.1S cells and KG1a cells (C) co-culturing are presented.

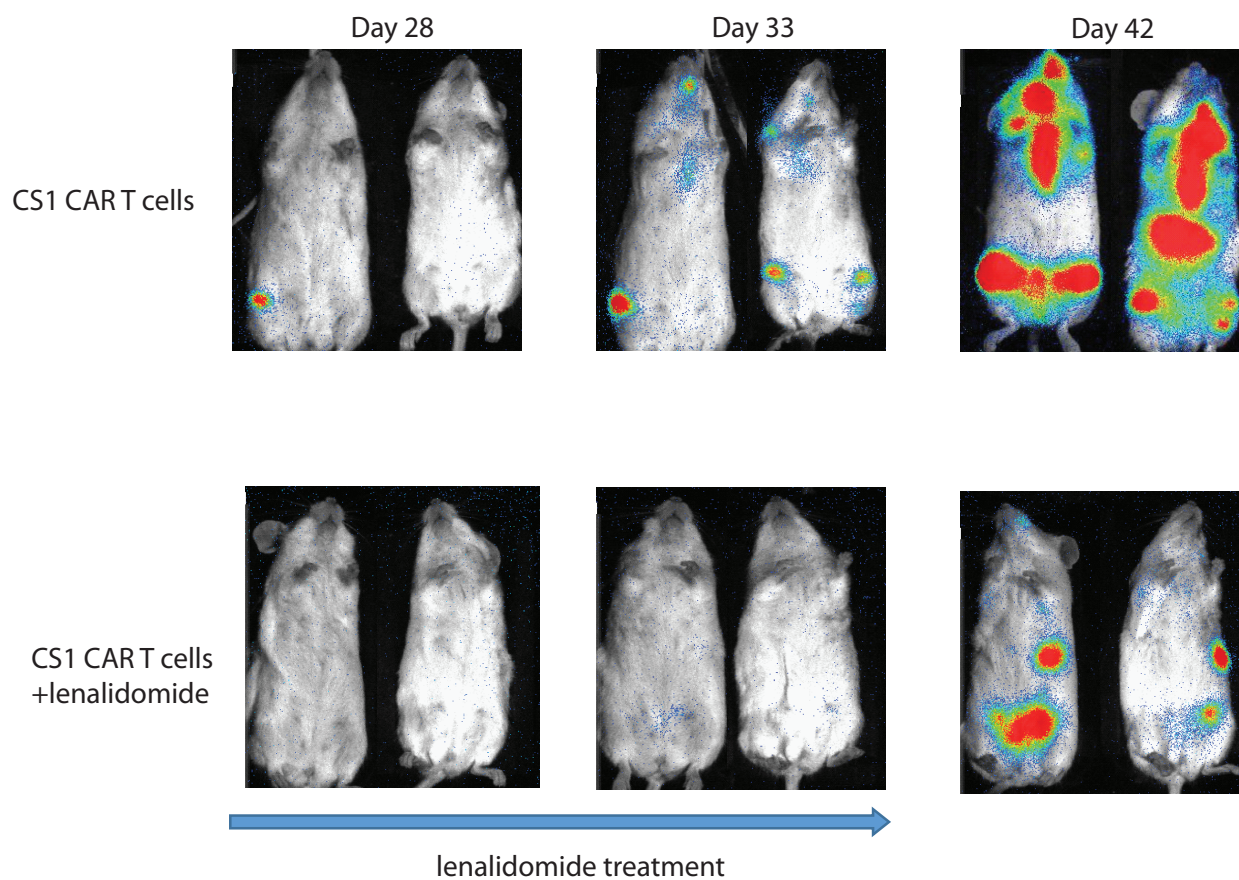

**Supplemental Figure 7. Lenalidomide improved the anti-MM activity of CS1 CAR T cells** A total of  $2 \times 10^6$  fflucGFP MM.1S cells were intratibially (i.t.) injected into NSG mice. Five days following tumor inoculation, mice received a single injection (i.v.) of dosed  $1 \times 10^6$  CAR T cells and 5-7.5 mg/kg lenalidomide i.p injection daily for 30 days. Tumor signals at the indicated time points are presented.



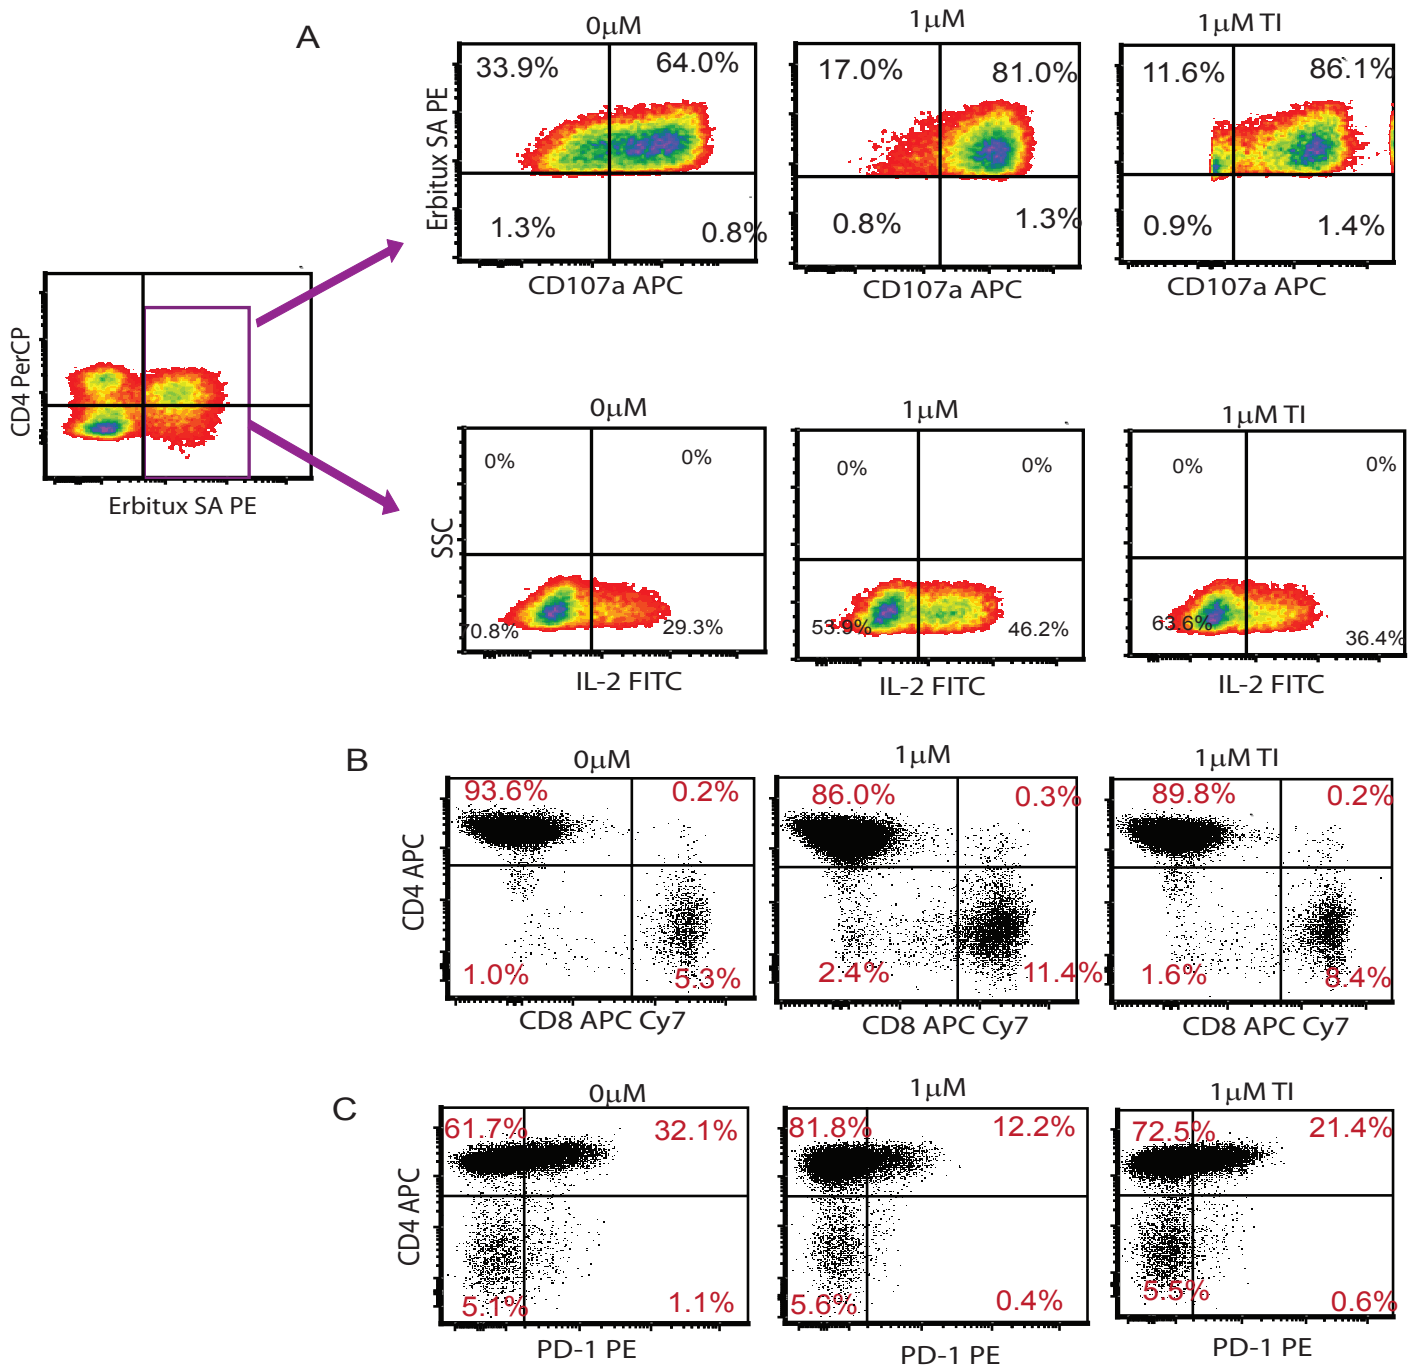

**Supplemental Figure 9. Lenalidomide enhances CS1 CAR T cell function only when continuous combinatorial therapy is applied** Central memory T cells were activated and transduced with lentivirus encoding CS1 CAR and expanded in vitro in the presence of 0 and 1μM lenalidomide for 2 weeks. We then split the cultures into two groups, one continued getting 1μM lenalidomide every other day and another culture stopped lenalidomide as therapeutic interruption (TI). Two weeks later, (A) intracellular IL-2 and degranulation marker CD107a were analyzed upon stimulation with MM.1S cells. (B) Percentages of CD8<sup>+</sup> T cells and (C) PD1 expression on the T cells were determined with flow cytometry and presented.
